# Supplementary material
Source: PubMed Central journal article supplement (PMC6658754)
Supplement: AAC.00609-19-s0001.pdf [file AAC.00609-19-s0001.pdf]

## SUPPLEMENTARY MATERIALS

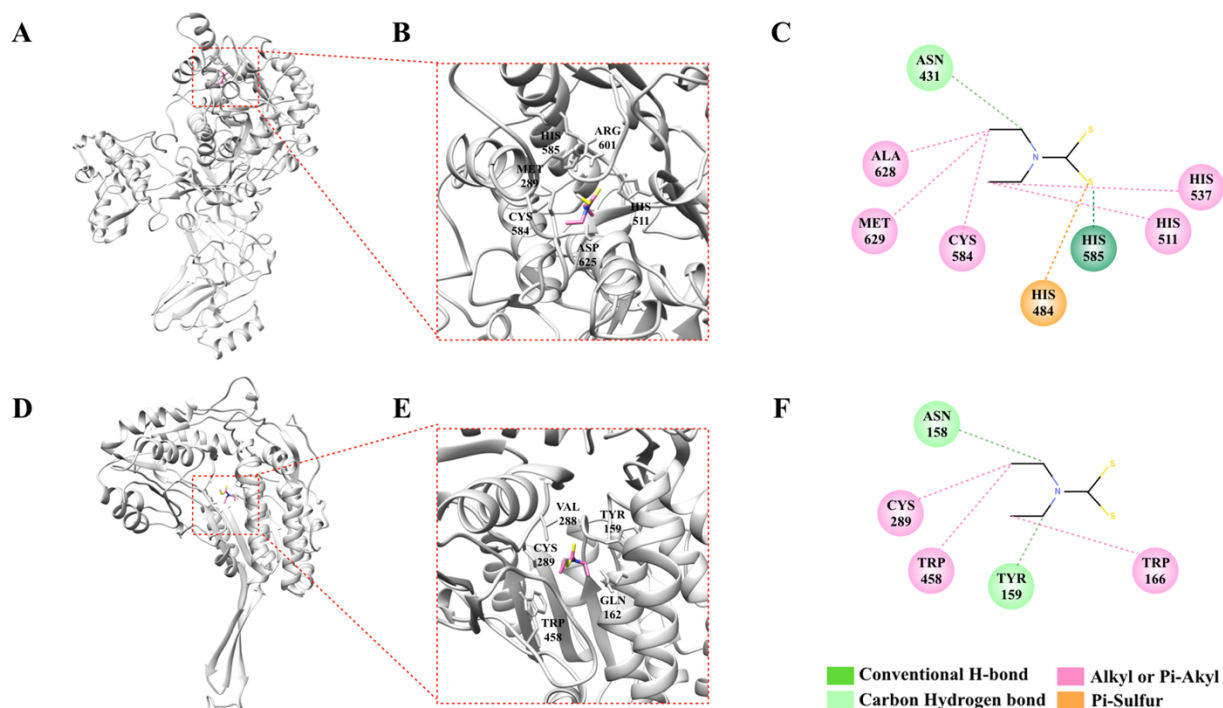

**Figure S1. Complexes of the ligand ‘diethyldithiocarbamic acid (DDC)’ and the predicted three-dimension structures of the urease (A-C) and aldehyde dehydrogenase (D-F) of *P. insidiosum*.** **A** and **D** show ribbon structure models, while **B** and **E** depict enlarged structure showing molecular docking of DDC. Figures **C** and **F** show two-dimension interactions of DDC and the predicted binding sites of urease and aldehyde dehydrogenase, respectively. The interacting amino acids and types are shown in figures **B**, **C**, **E**, and **F**.

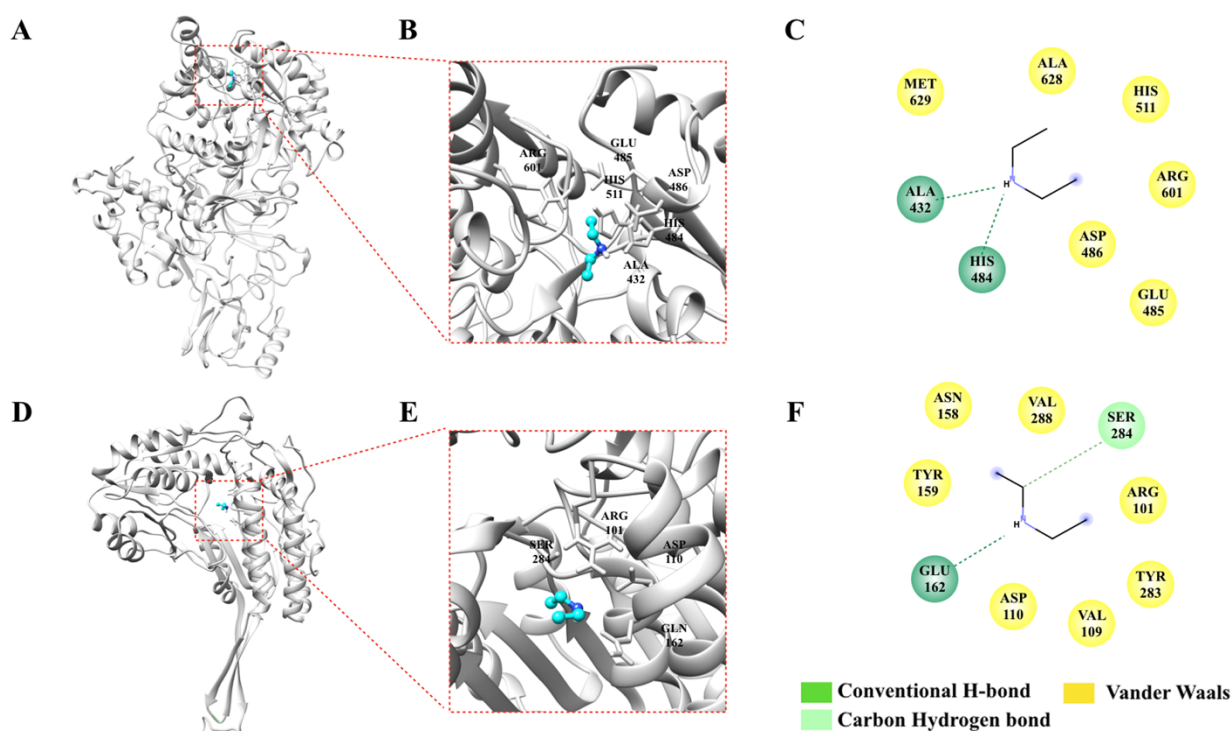

**Figure S2. Complexes of the ligand ‘diethylamine (DEA)’ and the predicted three-dimension structures of the urease (A-C) and aldehyde dehydrogenase (D-F) of *P. insidiosum*.** A and D show ribbon structure models, while B and E depict enlarged structure showing molecular docking of DEA. Figures C and F show two-dimension interactions of DEA and the predicted binding sites of urease and aldehyde dehydrogenase, respectively. The interacting amino acids and types are shown in figures B, C, E, and F.

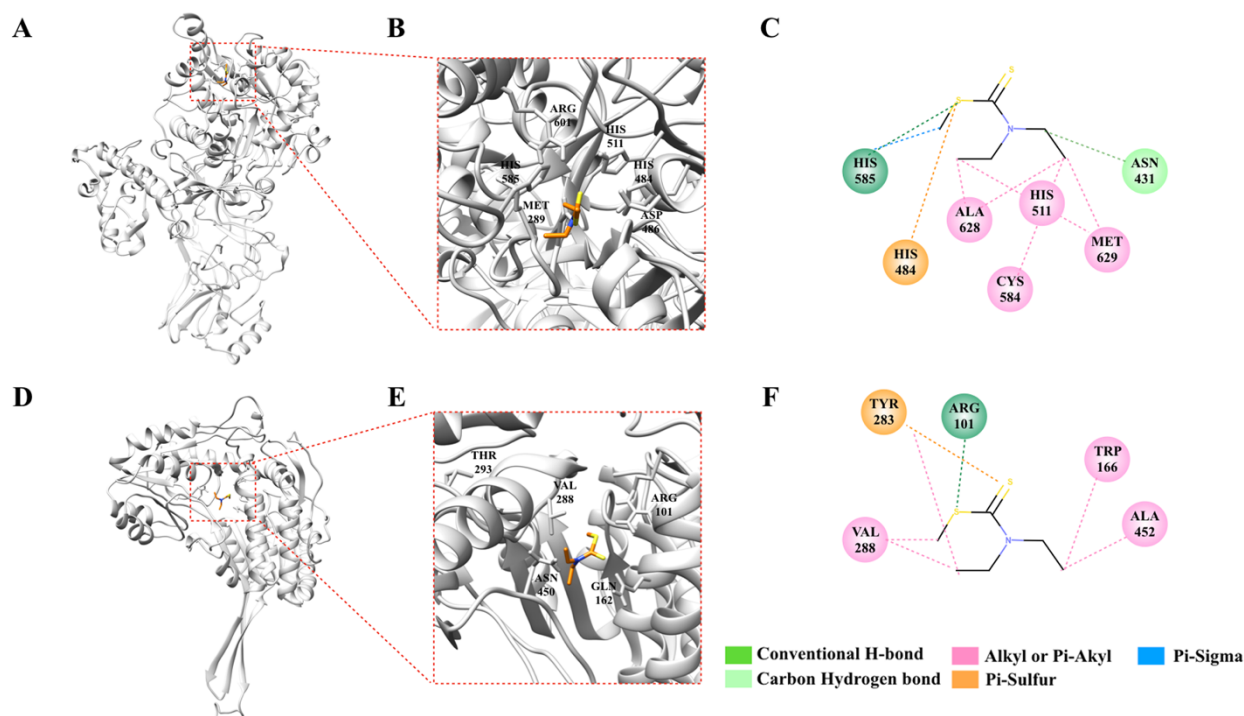

**Figure S3. Complexes of the ligand ‘diethyldithiomethylcarbamate (Me-DDC)’ and the predicted three-dimensional structures of the urease (A-C) and aldehyde dehydrogenase (D-F) of *P. insidiosum*.** A and D show ribbon structure models, while B and E depict enlarged structure showing molecular docking of Me-DDC. Figures C and F show two-dimension interactions of Me-DDC and the predicted binding sites of urease and aldehyde dehydrogenase, respectively. The interacting amino acids and types are shown in figures B, C, E, and F.
